# Supplementary material for: Discovery of Notch Pathway-Related Genes for Predicting Prognosis and Tumor Microenvironment Status in Bladder Cancer
Source: Front Genet. 2022 Jun 30;13:928778. doi: 10.3389/fgene.2022.928778 (PMC9279929; doi:10.3389/fgene.2022.928778)
Supplement: Supplementary file 1 [file Table1.XLS]

## Sheet: Sheet1
Table S1: 428 Notch pathway-related genes.
ADAM17
APH1A
CIR1
CREBBP
CTBP1
CTBP2
DLL1
DLL3
DLL4
DTX1
DTX2
DTX3
DTX3L
DTX4
DVL1
DVL2
DVL3
EP300
HDAC1
HDAC2
HES1
HES5
JAG1
JAG2
KAT2A
KAT2B
LFNG
MAML1
MAML2
MAML3
MFNG
NCOR2
NCSTN
NOTCH1
NOTCH2
NOTCH3
NOTCH4
NUMB
NUMBL
PSEN1
PSEN2
PSENEN
PTCRA
RBPJ
RBPJL
RFNG
SNW1
AGO1
AGO2
AGO3
AGO4
ATP2A1
ATP2A2
ATP2A3
B4GALT1
CCND1
E2F1
E2F3
ELF3
FURIN
H2AB1
H2AC14
H2AC20
H2AC4
H2AC6
H2AC7
H2AC8
H2AJ
H2AX
H2AZ1
H2AZ2
H2BC1
H2BC10
H2BC11
H2BC12
H2BC13
H2BC14
H2BC15
H2BC17
H2BC21
H2BC3
H2BC4
H2BC5
H2BC6
H2BC7
H2BC8
H2BC9
H2BS1
H2BU1
H3-3A
H3-3B
H3C1
H3C10
H3C11
H3C12
H3C13
H3C14
H3C15
H3C2
H3C3
H3C4
H3C6
H3C7
H3C8
H4-16
H4C1
H4C11
H4C12
H4C13
H4C14
H4C15
H4C2
H4C3
H4C4
H4C5
H4C6
H4C8
H4C9
JUN
MAMLD1
MIR150
MIR181C
MIR200B
MIR200C
MIR206
MIR302A
MIR34B
MIR34C
MIR449A
MIR449B
MIR449C
MOV10
POFUT1
POGLUT1
PRKCI
RAB6A
RUNX1
SEL1L
SIRT6
ST3GAL3
ST3GAL4
ST3GAL6
TFDP1
TFDP2
TMED2
TNRC6A
TNRC6B
TNRC6C
TP53
ACTA2
ADAM10
AKT1
APH1B
ARRB1
ARRB2
CCNC
CDK8
CNTN1
CREB1
CUL1
DLGAP5
DLK1
DNER
EGF
EGFR
FABP7
FBXW7
FCER2
FLT4
GZMB
HDAC10
HDAC11
HDAC3
HDAC4
HDAC5
HDAC6
HDAC7
HDAC8
HDAC9
HEY1
HEY2
HEYL
HIF1A
IKZF1
ITCH
MDK
MIB1
MIB2
MYC
NBEA
NCOR1
NEURL1
NEURL1B
PBX1
PLXND1
PSMA1
PSMA2
PSMA3
PSMA4
PSMA5
PSMA6
PSMA7
PSMB1
PSMB10
PSMB2
PSMB3
PSMB4
PSMB5
PSMB6
PSMB7
PSMB8
PSMB9
PSMC1
PSMC2
PSMC3
PSMC4
PSMC5
PSMC6
PSMD1
PSMD10
PSMD11
PSMD12
PSMD13
PSMD14
PSMD2
PSMD3
PSMD4
PSMD5
PSMD6
PSMD7
PSMD8
PSMD9
PSME1
PSME2
PSME3
PSMF1
RBX1
RPS27A
SEM1
SKP1
SMAD3
STAT1
TACC3
TBL1X
TBL1XR1
TLE1
TLE2
TLE3
TLE4
UBA52
UBB
UBC
WWC1
WWP2
YBX1
YWHAZ
ADAM12
CBL
CDKN1A
CNTN6
DNM1
ENO1
EPS15
GATA3
IL4
KDM1A
LNX1
MARK2
MFAP2
MFAP5
MYCBP
RAB11A
RBBP8
SKP2
SPEN
SSPOP
YY1
FBXW11
FZD1
FZD5
FZD7
PPARD
PRKCA
SAP30
TCF7L2
WNT2
WNT5A
FHL1
GSK3B
HES6
JAK2
LCK
MAGEA1
MAPT
MIR1281
NFKB1
PIK3R1
PIK3R2
RING1
SRC
STAT3
AAK1
AGXT
ANGPT4
ANXA4
APP
ARRDC1
ASCL1
ATOH1
BCL6
BEND6
BLOC1S2
BMP2
BMP2K
BMP7
CBFA2T2
CCN3
CD46
CDH6
CDK3
CDK6
CDKN1B
CEBPA
CFAP58
CFD
CHAC1
DLK2
DLX1
DLX2
EGFL7
ENHO
EPN1
EPN2
ETV2
FGF10
FOXA1
FOXC1
FOXC2
GALNT11
GAS2
GATA2
GATA5
GMDS
GOT1
GRIP2
GSX2
HES3
HES7
HIF1AN
HNF1B
HOXD3
IFT172
IFT74
IL17A
IL2RA
IL6ST
ITGB1BP1
KCNA5
KIT
KRT19
LLGL1
LLGL2
MESP1
MESP2
METTL3
MIR1224
MIR126
MIR212
MMP14
NEPRO
NEUROD4
NFKBIA
NIBAN2
NKAP
NLE1
NOD2
NOS3
NOTCH2NLA
NOTCH2NLB
NOTCH2NLC
NR0B2
NR1H4
NRARP
ONECUT1
PDCD10
PERP
PGAM2
PLN
POSTN
PRAG1
PTP4A3
RBM15
RIPPLY2
RITA1
ROBO1
ROBO2
S1PR3
SIX1
SLC35C1
SLC35C2
SNAI1
SNAI2
SORBS2
SOX9
SREBF2
SUSD5
SYNJ2BP
TBX2
TCIM
TGFB2
TGFBR2
TIMP4
TM2D3
TMEM100
TP63
TRAF7
TSPAN14
TSPAN15
TSPAN5
TSPEAR
WDR12
WNT1
YAP1
YJEFN3
YTHDF2
ZBTB7A
ZMIZ1
ZNF423
